# Supplementary material for: Tetracycline Adsorption on Magnetic Sludge Biochar: Effects of pH, Humic Acid (HA), and Fulvic Acid (FA)
Source: MDPI journal article supplement (doi:10.3390/mi13071057), 2022-06-30
Supplement: s1 [file micromachines-1763837-supplementary.pdf › micromachines-1763837-supplementary.pdf]

# Supplementary Materials: Tetracycline Adsorption on Magnetic Sludge Biochar: Effects of pH, Humic Acid (HA), and Fulvic Acid (FA)

Yuanhui Wu <sup>1,2,\*</sup>, Meizhi Yang <sup>3</sup>, Dan Long <sup>1,2</sup>, Fanian Yang <sup>1,2</sup> and Suxing Luo <sup>1,2,\*</sup>

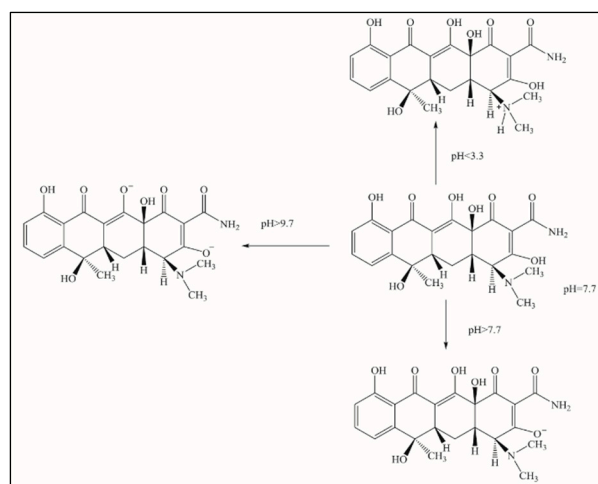

**Figure S1.** Various structures of TC under different conditions.

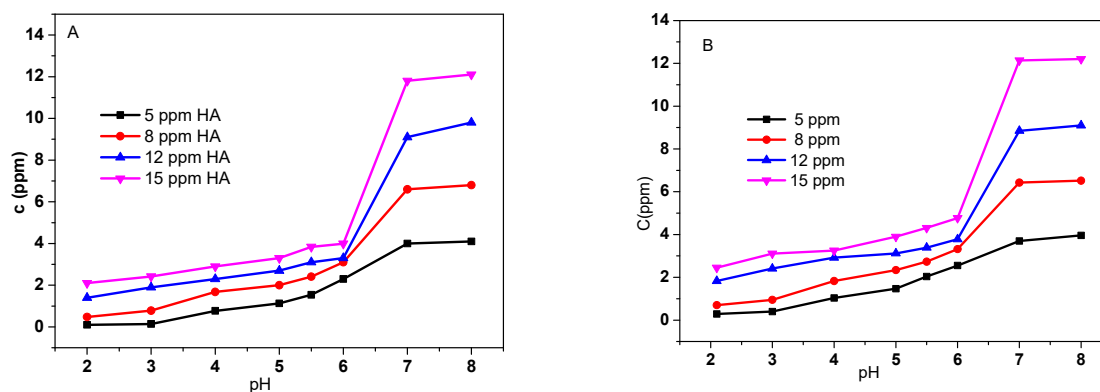

**Figure S2.** The adsorption behaviors of HA and FA on magnetic sludge biochar as a function of pH in the absence of TC (A: HA; B: FA).

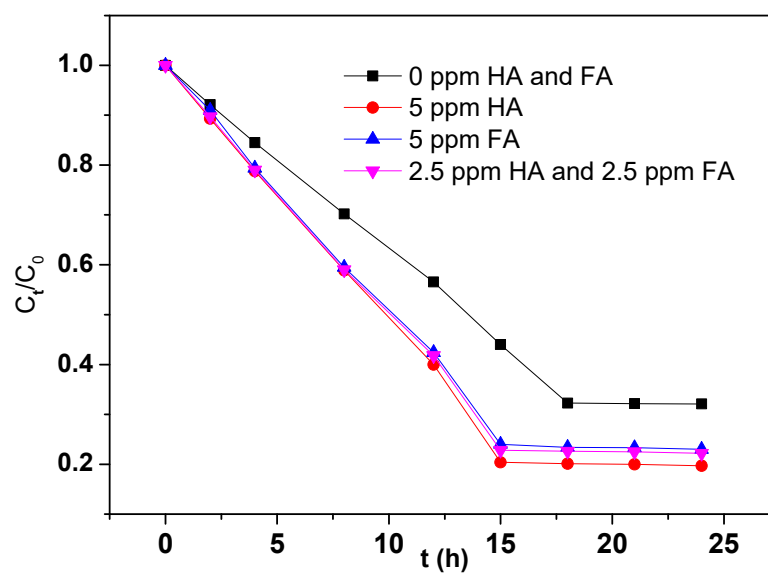

**Figure S3.** TC sorption behavior on magnetic sludge biochar as a function of the co-existence of HA and FA.
